# Supplementary material
Source: publisher figshare collection journal article supplement (https://gsapubs.figshare.com/articles/dataset/_/12507449)
Supplement: Supplementary file 1 [file 1]

Chao Lin, Jinjiang Zhang, Xiaoxian Wang, Tianli Huang, Bo Zhang, and Yunsong Fan, 2020, Himalayan Miocene adakitic rocks, a case study of the Mayum pluton: Insights into geodynamic processes within the subducted Indian continental lithosphere and Himalayan mid-Miocene tectonic regime transition: GSA Bulletin, <https://doi.org/10.1130/B35640.1>.

## Supplemental Material

**Table S1.** Bulk element geochemistry and isotopic composition of the Mayum pluton.

**Table S2.** Zircon LA–ICP–MS U–Pb data for the Mayum pluton.

**Table S3.** Zircon in situ Lu–Hf isotopic data for the Mayum pluton.

**Table S4.** Data statistics for Himalayan Eocene and Miocene adakitic rocks.
